# Supplementary material
Source: Springer Nature journal article supplement (https://www.springermedizin.de/resource/supplementary/12889_2011_3686_MOESM2_ESM.pdf/9489712)
Supplement: MOESM2 [file 9489712]

### **School practice**

#### *General school practice for parental involvement*

- Personal informal contacts were preferred over other communication channels

#### *Health promotion policy*

- There appeared to be more school efforts for healthy eating promotion than PA promotion and SB prevention

### **The vision on the role of school and parents in health promotion**

#### *Healthy eating promotion*

- Parents have main responsibility, school has a supporting role

#### *PA promotion*

- Shared responsibility between parents and school

#### *SB prevention*

- Parents have responsibility

### **Parental motivation**

Parents were more motivated to participate in healthy eating promotion than PA promotion or SB prevention

## **Parental participation in school-based promotion of EBRBs**

### **Type of activities**

#### *Place of activities*

- Parents like both home-based and school-based activities

#### *Characteristics of organized activities*

- Pleasant, interactive, practical and including children
- School-based: e.g. cooking session, walking/cycling excursions
- Home-based: e.g. homework assignments and class contents involving parents

### **Facilitators**

- Child involvement
- New and practical information through pleasant, interactive activities
- Early notification about planned activities
- Rewards and incentives
- Social interaction
- Organization of a limited amount of brief parental activities instead of many, long lasting activities
- Confrontation with negative consequences of an unhealthy lifestyle motivates them to be more involved

### **Barriers**

- Lack of time
- No interest
- No felt need for information
- Dislike of being tutored or judged
- No energy for extra efforts
- Financial constraints
- Unfamiliarity with other parents
